# Supplementary material
Source: Springer Nature journal article supplement (https://www.springermedizin.de/resource/supplementary/12943_2013_1510_MOESM8_ESM.pdf/9552302)

## Normal epithelium

Stem cells  
hierarchy

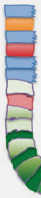

Notch  
inhibition

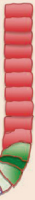

## Adenoma

Stem cells  
hierarchy

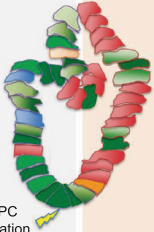

Notch  
inhibition

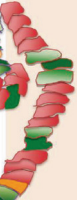

APC  
mutation

## Adenocarcinoma

Stem cells  
hierarchy

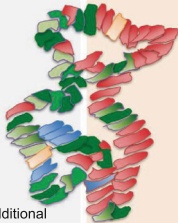

Notch  
inhibition

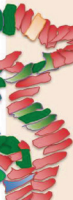

Additional  
mutation

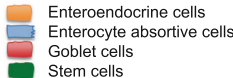

Supplement: MOESM8 [file 9552302]
